# Supplementary material for: Sleep Disturbance May Alter White Matter and Resting State Functional Connectivities in Parkinson’s Disease
Source: Oxford University Press journal article supplement (doi:10.1093/sleep/zsx009), 2017-01-28
Supplement: zsx009_suppl_Supplemental_Table_S1.docx [file zsx009_suppl_Supplemental_Table_S1.docx]

**Table S1. The anatomical locations displaying significant group differences from the seed ROIs in the DMN, CEN, and DAN**

| ROIs | Group comparison | Brain regions | Side | Coordinates (mm) | | | Maximum t | Voxels |
| --- | --- | --- | --- | --- | --- | --- | --- | --- |
|  |  |  |  | x | y | z |  |  |
| **DMN** | Control vs. PD-SD+ | Precentral gyrus | R | 18 | -30 | 60 | 3.765 | 2439 |
|  |  | Postcentral gyrus | L | -26 | -42 | 62 | 4.638 | 10573 |
|  |  | Middle occipital gyrus | L | -34 | -70 | 2 | 4.294 | 1601 |
|  |  | Culmen | L | -6 | -70 | -10 | 3.586 | 642 |
|  |  | Precuneus | R | 22 | -78 | 50 | 3.217 | 625 |
|  |  | Inferior occipital gyrus | R | 52 | -84 | -10 | 3.619 | 462 |
|  |  | Cuneus | L | -28 | -86 | 26 | 3.563 | 427 |
|  | Control vs. PD-SD- | Precentral gyrus | L | -24 | -14 | 72 | 3.809 | 226 |
|  |  | Postcentral gyrus | R | 20 | -42 | 66 | 4.908 | 13688 |
|  |  | Posterior cingulate | L | -20 | -58 | 10 | 4.780 | 6064 |
|  |  | Precuneus | L | -20 | -78 | 38 | 4.093 | 668 |
|  | PD-SD+ vs. PD-SD- | Parahippocampal gyrus | L | -22 | -42 | -14 | 4.112 | 374 |
| **CEN** | Control vs. PD-SD+ | Precuneus | L | -4 | -72 | 42 | 4.470 | 457 |
|  | Control vs. PD-SD- | Superior parietal lobule | R | 40 | -70 | 60 | 4.351 | 1138 |
|  |  | Superior parietal lobule | L | -32 | -72 | 60 | 4.977 | 1009 |
|  |  | Precuneus | L | -2 | -72 | 46 | 4.568 | 851 |
|  |  | Cuneus | R | 18 | -72 | 8 | 4.362 | 736 |
|  | PD-SD+ vs. PD-SD- | Postcentral gyrus | R | 16 | -50 | 72 | 3.314 | 362 |
| **DAN** | Control vs. PD-SD+ | Lingual gyrus | R | 20 | -48 | -2 | 4.547 | 8370 |
|  |  | Cingulate gyrus | L | -24 | -42 | 40 | 4.870 | 1999 |
|  |  | Superior temporal gyrus | L | -40 | -42 | 6 | 4.325 | 1074 |
|  |  | Transverse temporal gyrus | R | 34 | -30 | 12 | 4.187 | 824 |
|  |  | Middle frontal gyrus | R | 34 | 14 | 70 | 4.051 | 520 |
|  |  | Precuneus | R | 10 | -82 | 38 | 3.536 | 462 |
|  |  | Precuneus | L | -2 | -88 | 44 | 4.442 | 381 |
|  | Control vs. PD-SD- | Insula | R | 34 | -18 | 16 | 5.700 | 19912 |
|  |  | Postcentral gyrus | R | 16 | -54 | 72 | 5.424 | 11384 |
|  |  | Middle frontal gyrus | L | -26 | 64 | 10 | 4.464 | 1379 |
|  |  | Postcentral gyrus | L | -46 | -24 | 46 | 4.366 | 769 |
|  |  | Precuneus | R | 22 | 78 | 38 | 4.162 | 567 |
|  |  | Cingulate gyrus | R | 8 | 10 | 46 | 4.413 | 372 |
|  | PD-SD+ vs. PD-SD- | Insula | R | 40 | 8 | -6 | 3.934 | 1447 |
|  |  | Medial frontal gyrus | L | -10 | -8 | 52 | 3.338 | 1322 |
|  |  | Supramarginal gyrus | L | -44 | -50 | 26 | 3.598 | 440 |
|  |  | Inferior frontal gyrus | L | -30 | 18 | -14 | 3.639 | 350 |
|  |  | Inferior parietal lobule | R | 54 | -36 | 42 | 4.105 | 315 |
